# Supplementary material
Source: publisher figshare collection journal article supplement (https://frontiersin.figshare.com/ndownloader/files/27357734)
Supplement: Supplementary file 1 [file 27357734]

Appendix 4:

**Appendix 4:** Provides a breakdown of the different interview responses that make up each barrier category.

| **Barrier** | **Description** | **Response type** |
| --- | --- | --- |
| Financial constraints | Respondent noted that a lack of Government budget and other finance for projects was reducing the levels of uptake and implementation | Budget for implementation (2) Budget (10) Finance (6) |
| Inter-Ministry collaboration | A failure to communicate between the ministries and other sectors limits the success of policy | Determining responsibility Coordination (3) Lack of collaboration (3) Ministry cooperation (7) Competing objectives Poor cross sector engagement |
| Capacity human / technical | low technical and human capacity acts as a barrier to policy creation and implementation as individuals don’t have the skills and expertise to complete what is required of them, or there are not enough people to put policy into action | Capacity (3) Expertise Technical capacity (3) Technical capacity at lower levels Human capacity (2) Knowledge Implementation capacity |
| Enforcement / verification | Without effective feedback, monitoring and enforcement it is hard to determine success and ensure adoption | Enforcement (5) Lack of MRV (2) No reporting on success Evaluation (2) |
| Knowledge brokerage | Refers to the feeling of respondents that the information needed to make decisions was either not there or not being made available to them | Info sharing Messy data Poor communication Lack of info (2) Provision of information Data sharing (2) |
| Top down structure | The top down structure of Government was considered a barrier as it failed to include local input | Top down approach Structure Top down (5) |
| Too much policy | Too much policy confuses the objectives and those supposed to implement them | Too much policy (5) |
| Climate change mainstreaming | When climate change is not incorporated into all decision making policy is less effective | CC not priority (3) CC not mainstreamed |
| Policy overlaps | Overlaps in policy create conflicting objectives, limiting the success of policy | Overlaps Policy conflicts (2) Policy not coherent |
| Implementation planning | A failure to create a plan for implementation results in low levels of adoption | Action plans No coherent plan Lack of implementation |
